# Supplementary material for: Structurally engineered heat loss suppression in nanogap-aligned nanowires for power efficient heating
Source: Royal Society of Chemistry journal article supplement (doi:10.1039/d4na00894d), 2025-01-01
Supplement: d4na00894d1.pdf [file d4na00894d1.pdf]

## Supplementary Information

### Structurally Engineered Heat Loss Suppression in Nanogap-Aligned Nanowires for Power Efficient Heating

Min-Seung Jo<sup>a,b</sup>, Beom-Jun Kim<sup>a</sup>, Myung-Kun Chung<sup>a</sup>, Se-Yoon Jung<sup>a</sup>, Min-Ho Seo<sup>c,d</sup>, Jae-Young Yoo<sup>e</sup>, Jae-Soon Yang<sup>a</sup>, Sung-Ho Kim<sup>a</sup> and Jun-Bo Yoon<sup>\*a</sup>

<sup>a</sup>School of Electrical Engineering, Korea Advanced Institute of Science and Technology (KAIST), 291 Daehak-ro, Yuseong-gu, Daejeon 34141, Republic of Korea

<sup>b</sup>Center for Bio-Integrated Electronics, Northwestern University, Evanston, IL, 60208, USA

<sup>c</sup>Department of Information Convergence Engineering, College of Information and Biomedical Engineering, Pusan National University, Republic of Korea

<sup>d</sup>School of Biomedical Convergence Engineering, College of Information and Biomedical Engineering, Pusan National University, Republic of Korea

<sup>e</sup>Department of Semiconductor Convergence Engineering, Sungkyunkwan University, Suwon 16419, Republic of Korea

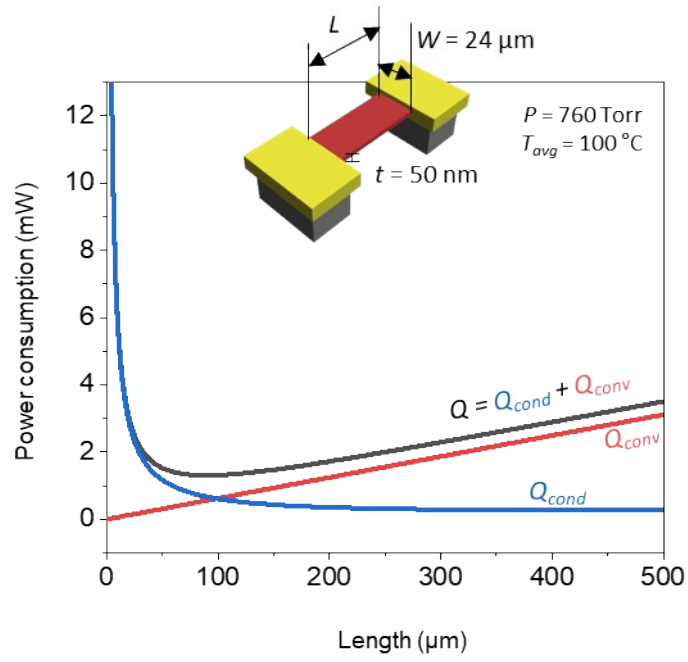

**Figure S1.** The analytic calculations of power consumption required to reach an average beam temperature of 100 °C at 760 torr in a 50 nm-thick, 24 μm-wide Pt thin film as a function of length (up to 500 μm), along with the trends in conduction and convection.

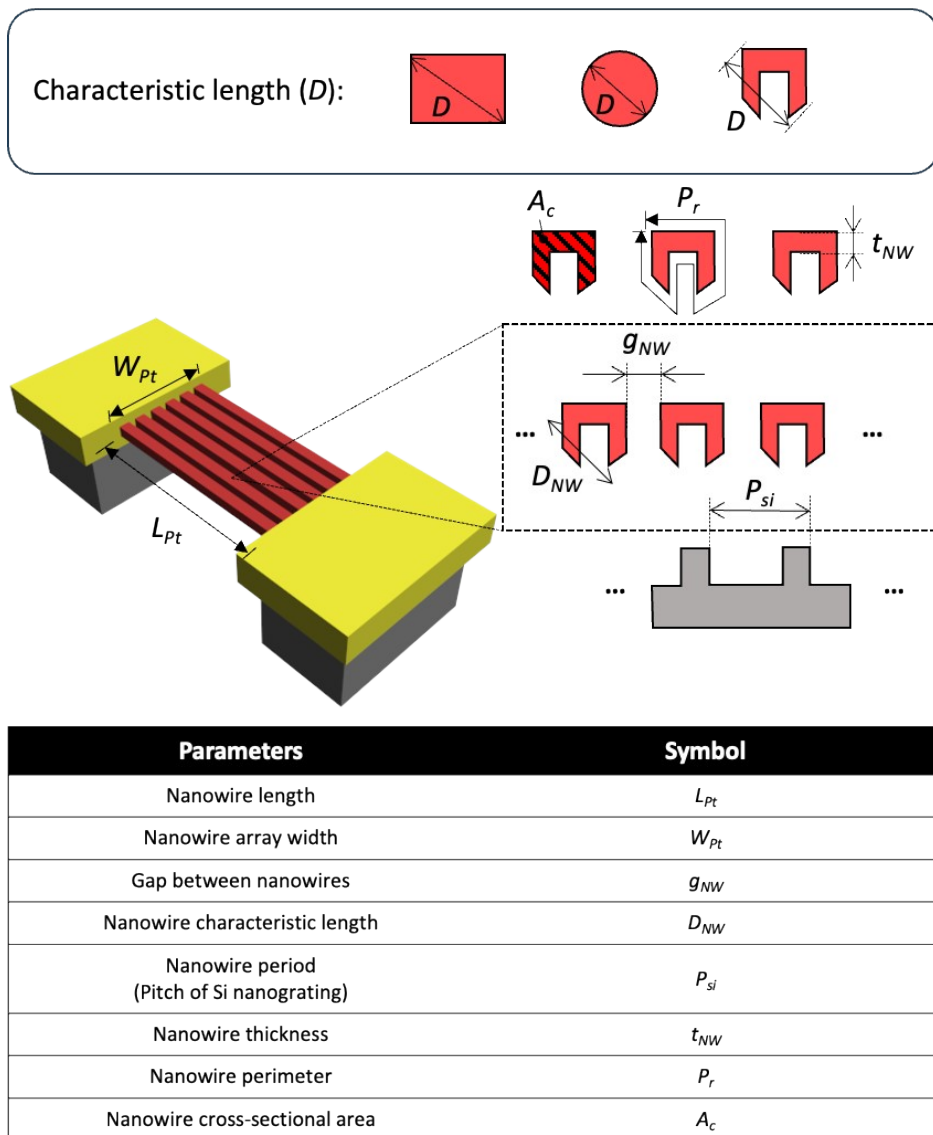

**Figure S2.** Geometrical parameters and symbols in the fabricated nanowire array for the calculation.

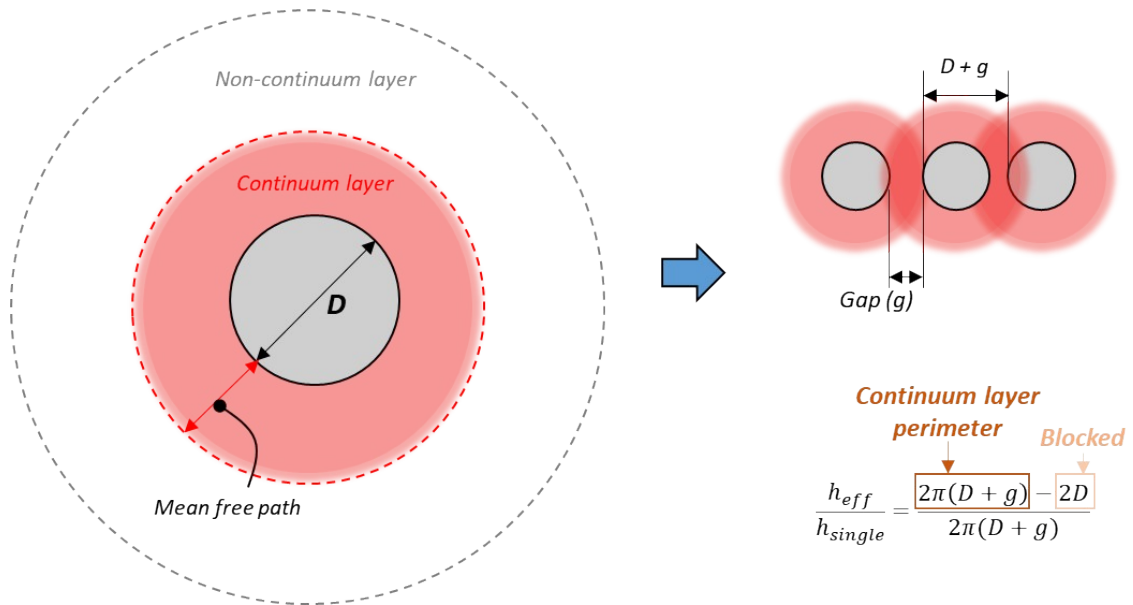

**Figure S3.** Schematic of the two-layer model showing the continuum layer and the change in the effective convective heat transfer coefficient when materials are close enough for their continuum layers to overlap, blocking molecular interactions.

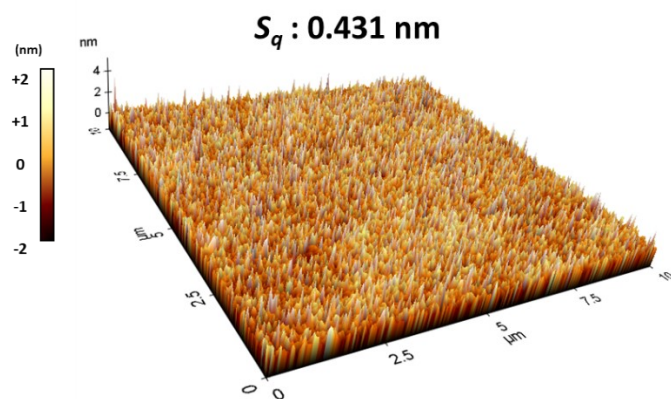

**Figure S4.** Measured surface roughness using atomic force microscopy for a 30 nm Pt film with a 10 nm Cr adhesion layer at the same deposition and annealing condition with other Pt samples.

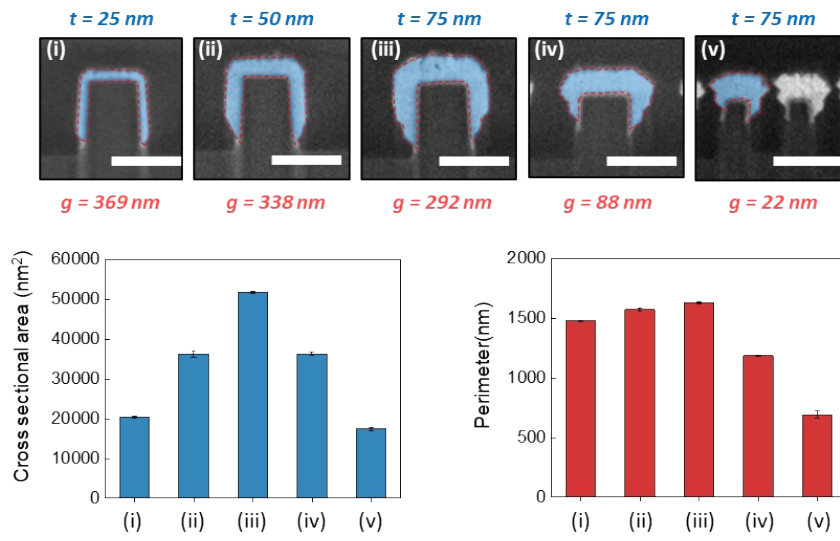

**Figure S5.** The cross-sectional area and perimeter of the fabricated C-shaped nanowires measured from the respective SEM images.

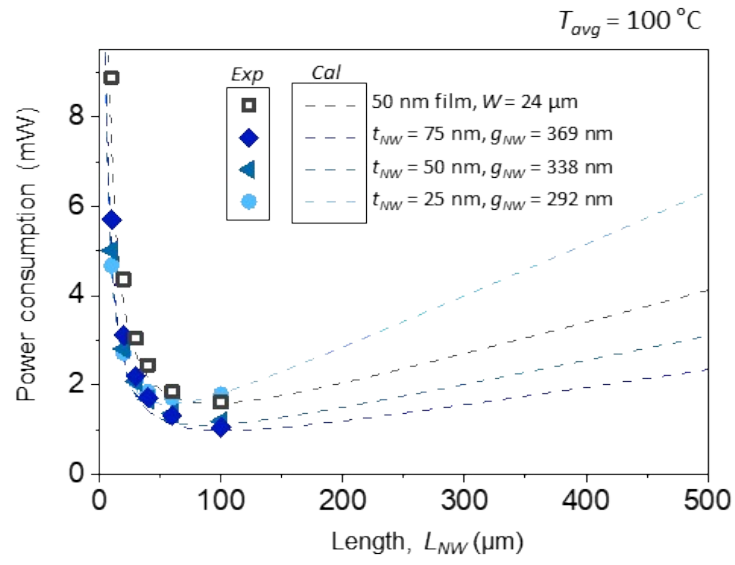

**Figure S6.** Power consumption with respect to length, up to 500  $\mu\text{m}$ , as an extended plot of Figure 4d.

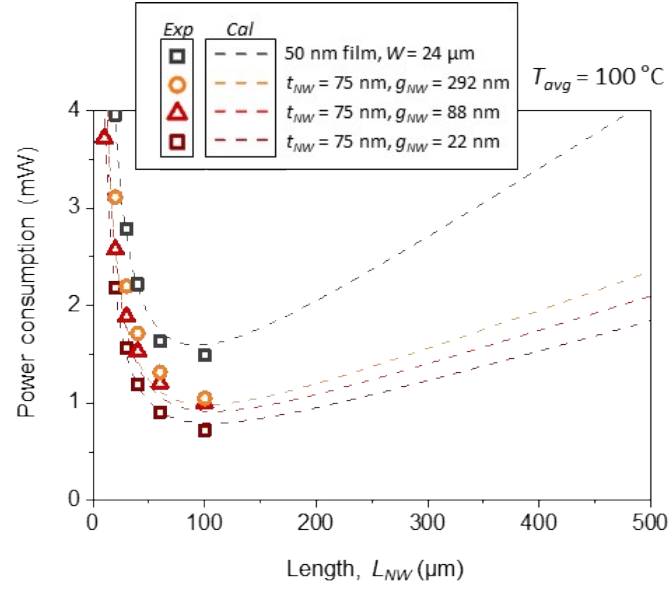

**Figure S7.** Power consumption with respect to length, up to 500  $\mu\text{m}$ , as an extended plot of Figure 5c.
